# Supplementary material for: Association of metabolically healthy obesity and elevated risk of coronary artery calcification: a systematic review and meta-analysis
Source: PeerJ. 2020 Mar 26;8:e8815. doi: 10.7717/peerj.8815 (PMC7103199; doi:10.7717/peerj.8815)
Supplement: Data S1 [file peerj-08-8815-s001.xlsx]

## Sheet: raw data to peerJ
Study	country	women in MHO (%)	smoke (%)	age	Duration (yr)	OR	LL	UL	lnOR	SElnOR	Article type	Definition
Kang, 2017	Korea	13.8	24.8	54.2	2.9	1.45	0.93	2.25	0.371564	0.225383	cohort	NCEP-ATPIII
Yoon,2017	Korea	9.8	17.8	54.6	3.75	1.65	1.14	2.4	0.500775	0.189908	cohort	NCEP-ATPIII
Kowall, 2018	Germany	73.6	16.4	58.3	5.1	1.24	0.78	1.97	0.215111	0.236351	cohort	NCEP-ATPIII
Sung, 2013	Korea	39	38.6	41.3	NA	0.93	0.67	1.31	-0.0725707	0.171047	cross section	others
Jung, 2014	Korea	17.7	23.6	52.3	NA	1.38	1.04	1.82	0.322083	0.142759	cross section	others
Echouffo-Tcheugui, 2019	USA	NA	NA	NA	NA	1.94	1.18	3.19	0.662688	0.253701	cross section	NCEP-ATPIII
