# Supplementary material for: Association of metabolically healthy obesity and elevated risk of coronary artery calcification: a systematic review and meta-analysis
Source: PubMed Central journal article supplement (PMC7103199; doi:10.7717/peerj.8815), 2020-03-26

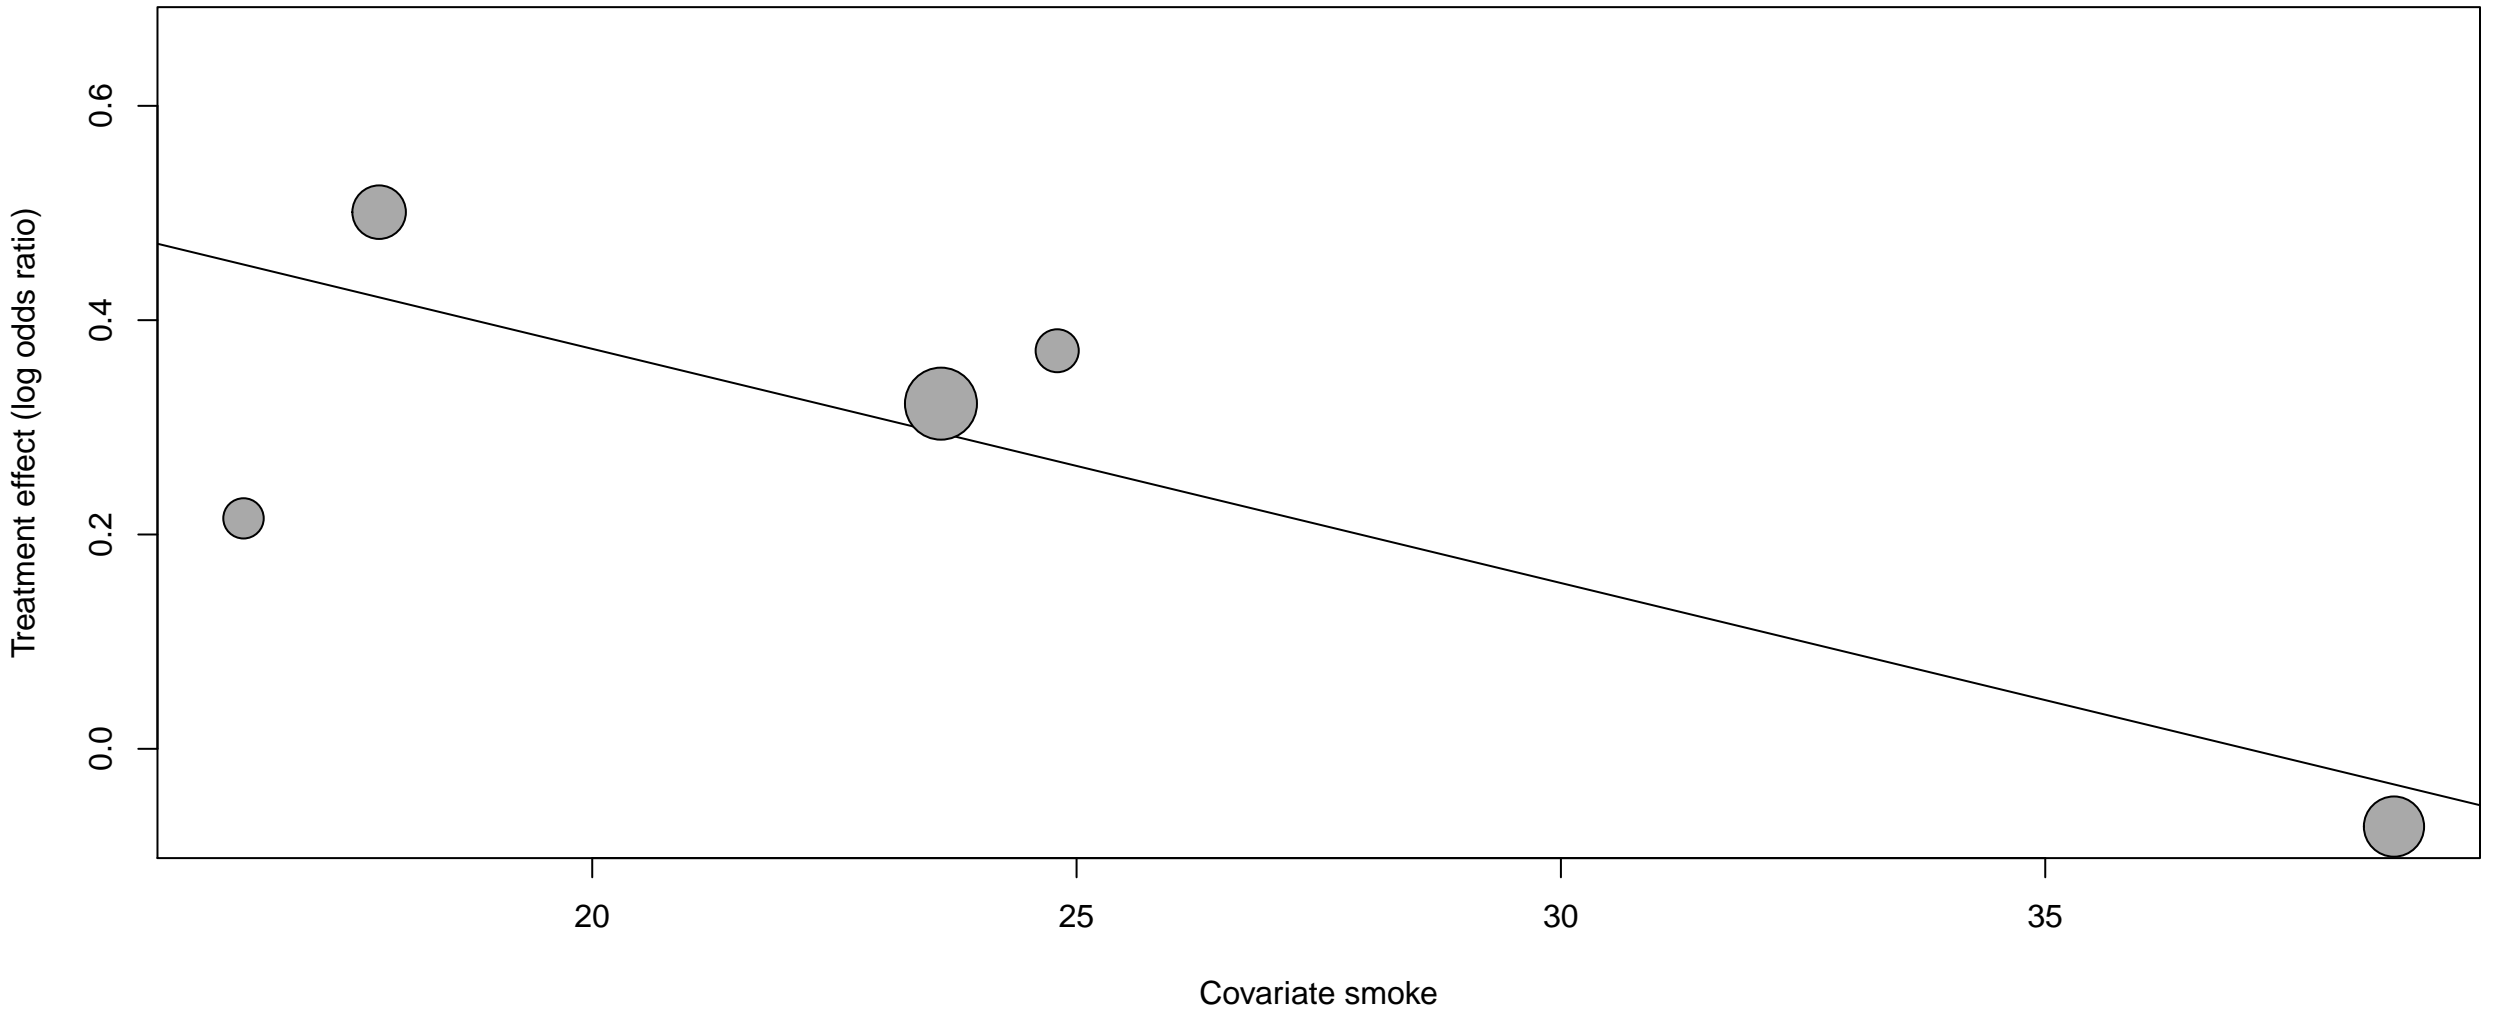

Supplement: peerj-08-8815-s008.pdf [file peerj-08-8815-s008.pdf]
